# Supplementary material
Source: PubMed Central journal article supplement (PMC3000950)
Supplement: supp_M110.180695_jbc.M110.180695-1.pdf [file supp_M110.180695_jbc.M110.180695-1.pdf]

**Supplemental Figure S1.** Human CTRP3A protein sequence is highly conserved throughout vertebrate evolution (Supplemental Fig. S1), with 99, 97, 96, 97, 97, 97, 96, 95, 91, 82, 89, and 78 % amino acid identity between full-length human and the corresponding sequences found in chimpanzee, dog, cat, pig, horse, cow, rat, mouse, opossum, platypus, chicken, and xenopus, respectively. Highly conserved Cys residues are indicated by ball-and-stick.

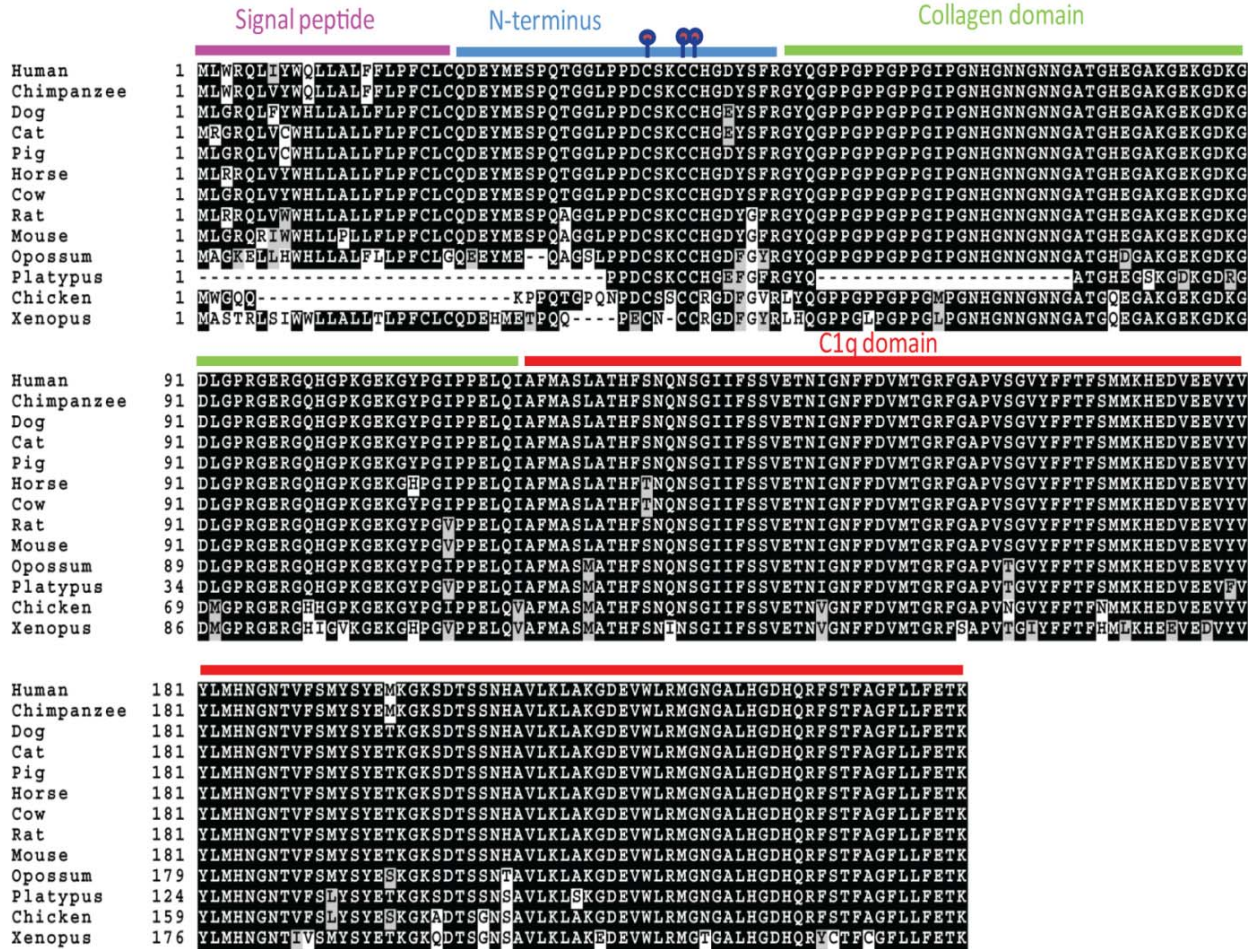

**Supplemental Figure S2.** The extra 73 amino acids found in the amino-terminus of CTRP3B are also highly conserved, with 100, 97, 93, 90, 93, 89, 83, 62, 71, 48, and 38 % amino acid identity between human and the corresponding sequences found in chimpanzee, dog, cat, pig, horse, rat, mouse, platypus, opossum, chicken, and xenopus, respectively. The highly conserved Asn where *N*-linked glycans attach is indicated by an arrow.

|            |   |                                                     | ↓ |                                      | <u>% identity</u>                                 |     |
|------------|---|-----------------------------------------------------|---|--------------------------------------|---------------------------------------------------|-----|
| Human      | 1 | VSGRTNKVVARIVQSHQQTGRSGS                            | - | RREKVRERSHPKTGTVDNNTSTD              | LKSLRPDELPHPEVDDLAQITTFWGQ                        | 100 |
| Chimpanzee | 1 | VSGRTNKVVARIVQSHQQTGRSGS                            | - | RREKVRERSHPKTGTVDNNTSTD              | LKSLRPDELPHPEVDDLAQITTFWGQ                        | 100 |
| Dog        | 1 | VSGRANKVVARIVQSHQQTGRSGS                            | - | RREKVRERSHPKTGTVDNNTSTD              | LKSLRPDELPHPEVDDLAQITTFWGQ                        | 97  |
| Cat        | 1 | VSGRAK <del>K</del> VVARIVQSHQQTGRSGS               | - | RREKVRERSHP <del>N</del> TGTVDNNTS   | ADLKSLRPDELPHPEVDDLAQITTFWGQ                      | 93  |
| Pig        | 1 | VSGRANKVVARIVQSHQQTGRSGS                            | - | RREKVRERSH <del>A</del> TGTVDNNTS    | ADLKSL <del>K</del> ADELPHPEVDDLAQITTFWGQ         | 90  |
| Horse      | 1 | VSR <del>R</del> RANKVVARIVQSHQQT <del>V</del> HSGS | - | RREKVRERSHPKTGTVDNNTSTD              | LKSLRPDELPHPEVDDLAQITTFWGQ                        | 93  |
| Rat        | 1 | VSR <del>R</del> RANKAVARIVQSHQQTGRSGS              | - | RREKVR <del>E</del> QSHAKTGTVDNNTSTD | LKSLRPDELPHPEVEDLAQITTFWGQ                        | 89  |
| Mouse      | 1 | VSR <del>R</del> RANKAVARIVQSHQQTGRSGS              | - | RREKVR <del>E</del> QSQAKTGTVDNNTSTD | LK <del>F</del> LRPEALPHPEVEDLAQITTFWGQ           | 83  |
| Platypus   | 1 | VSR <del>R</del> RANKAVARIVQSHHQTGRSDS              | - | RRE <del>Q</del> MRARSHPMAGTVDNSTS   | ADLDP-----PGSEVDDLAQITPSY---                      | 62  |
| Opossum    | 1 | VSGRANKAVARIVQSHHQTG-----                           | - | RREKVRERSHP <del>I</del> E           | GTVDNNTSPGPE <del>S</del> LRPDVLSHPDLNDLAQITSY--- | 71  |
| Chicken    | 1 | VSR <del>R</del> SYKPVAKVLQSHHQTGHKGRS              | - | RREILKQRSQLEWTVANSSSTD               | QNVLR-----PEVDDVELTSDRVQ                          | 48  |
| Frog       | 1 | VRRRFNKPVARVVE <del>S</del> RHQRTSNNAPS             | - | RREVVGQLDQLVE-AFANSSADTVLMR          | -----QEVD <del>D</del> LEQ-----                   | 38  |
